# Supplementary material
Source: PubMed Central journal article supplement (PMC3135172)

# Figure S1

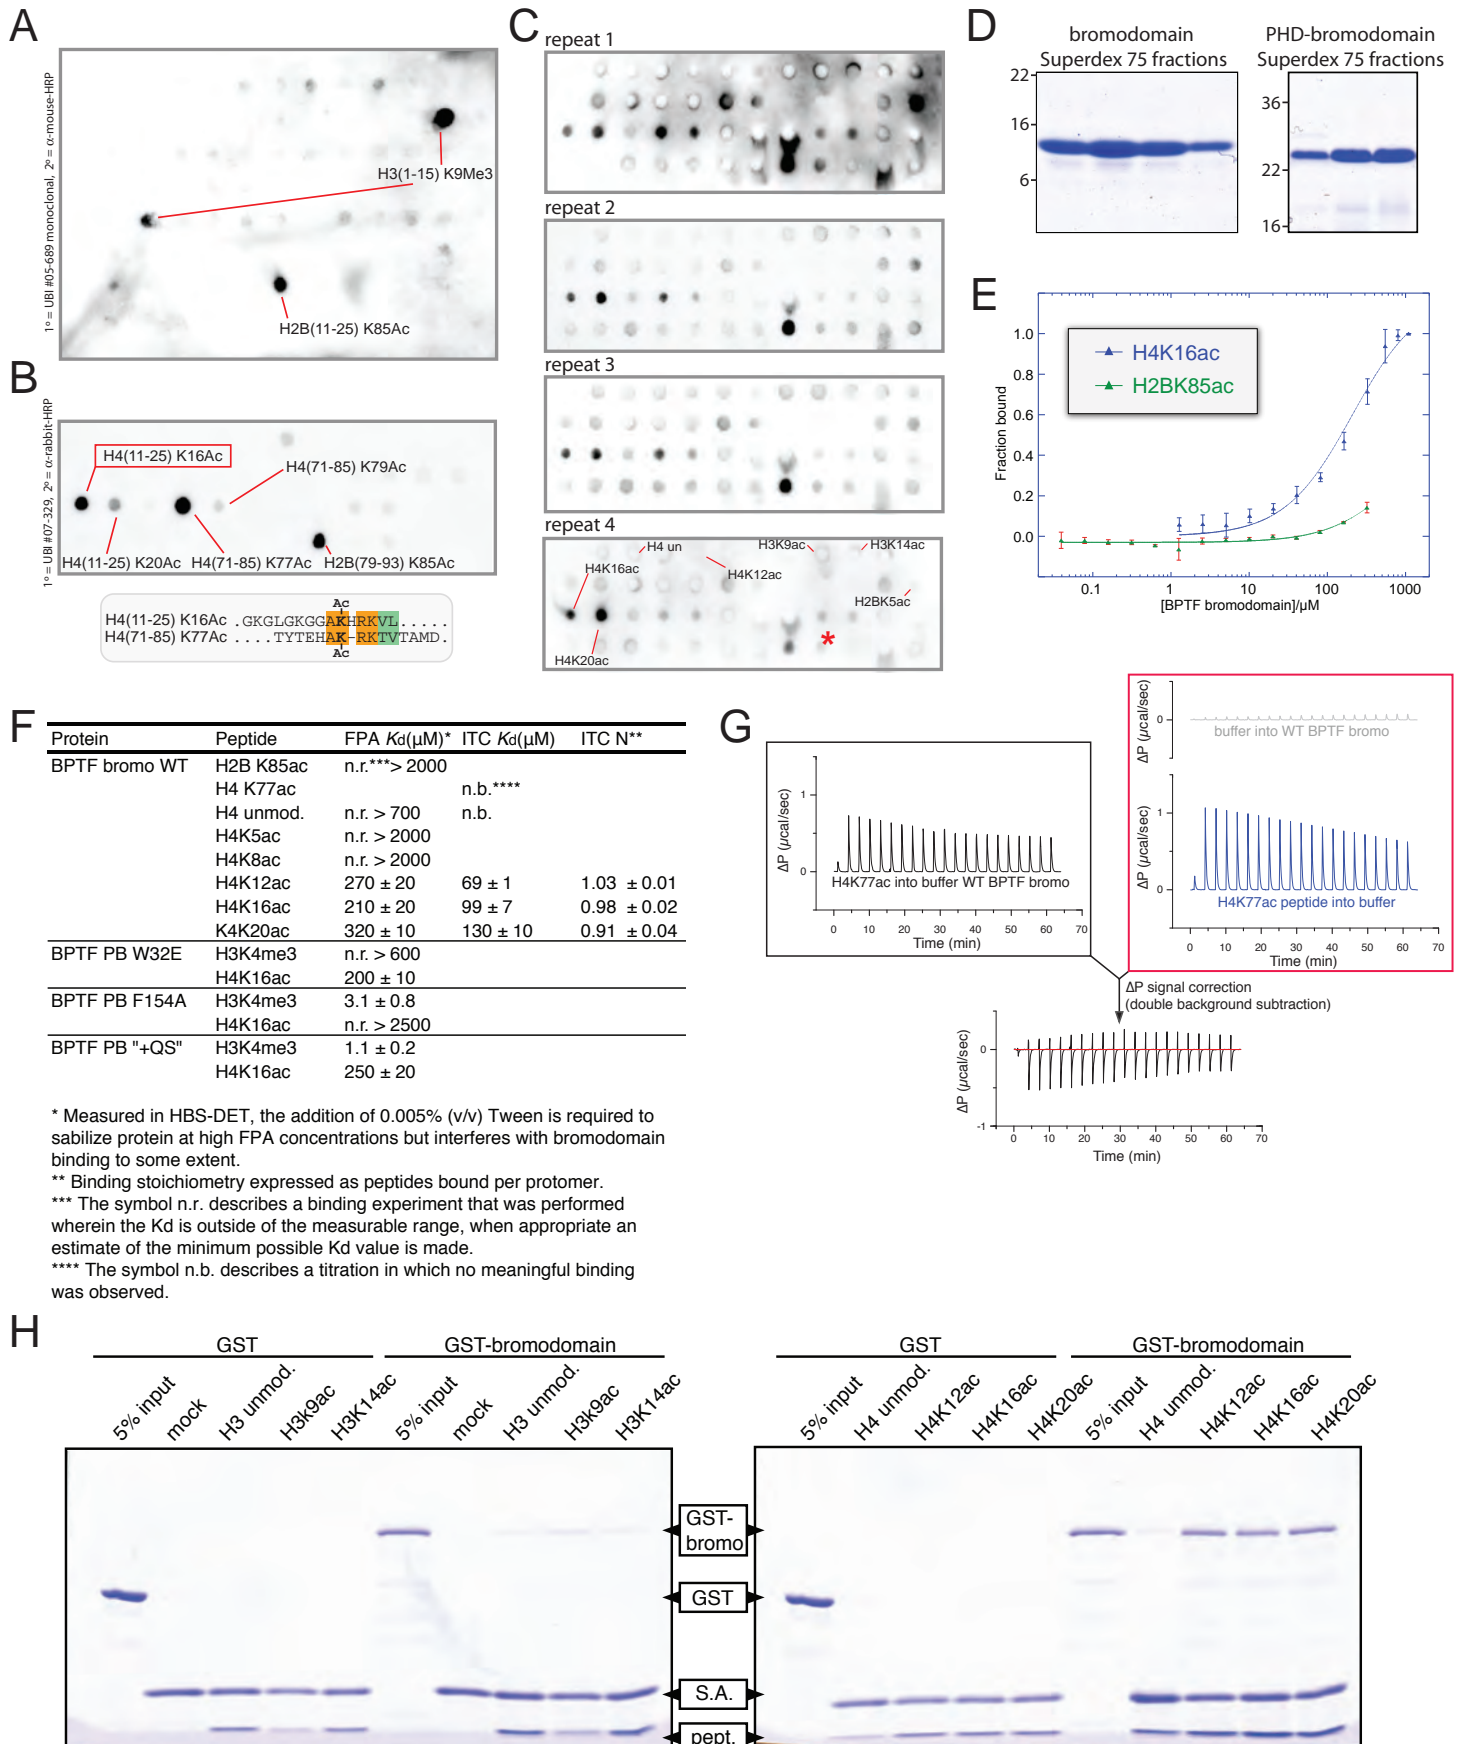

# Figure S2

**A** 5' - gccagCggtagccctagctcacgggcGgccacggcc - 3'  
 3' - cggtcGccagcgggatcgagtgcccgCcggtgccgg - 5'

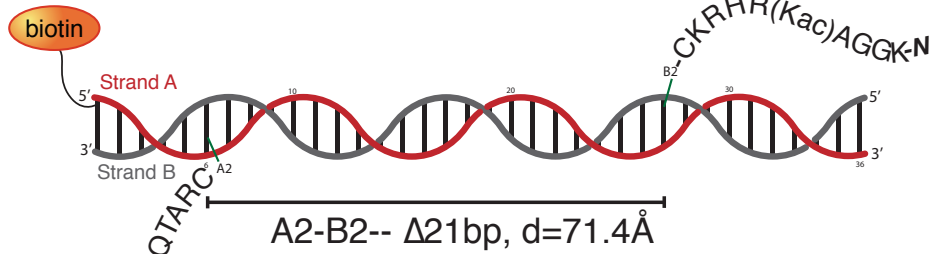

H3 peptide(1-8+C): ARTK(Me3)QTARC-  
 H4 peptide(12-20+C): KGGAK(Ac)RHRKC-

One residue beyond what is ordered in the structures

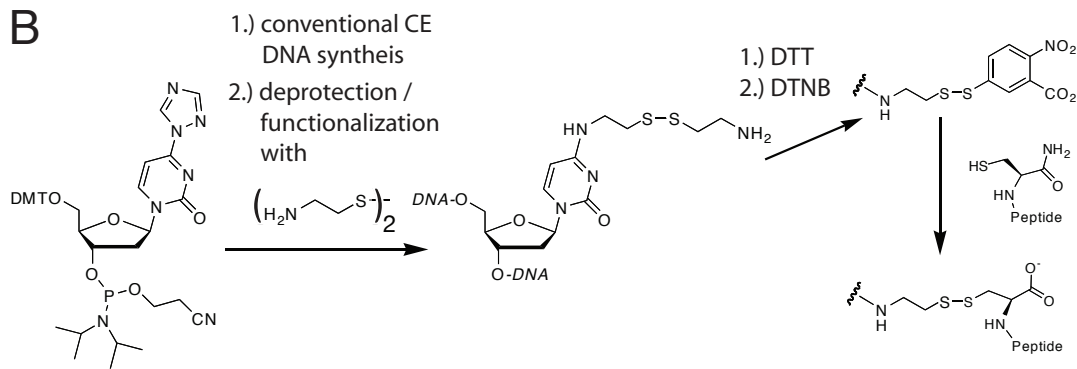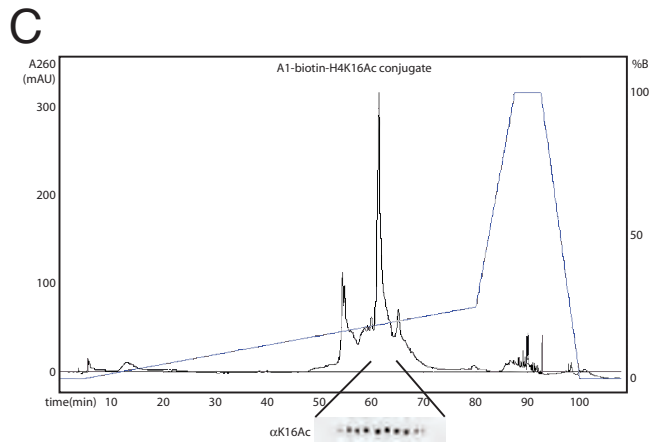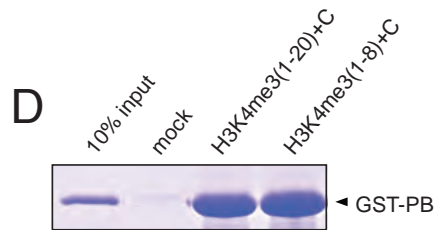

# Figure S3

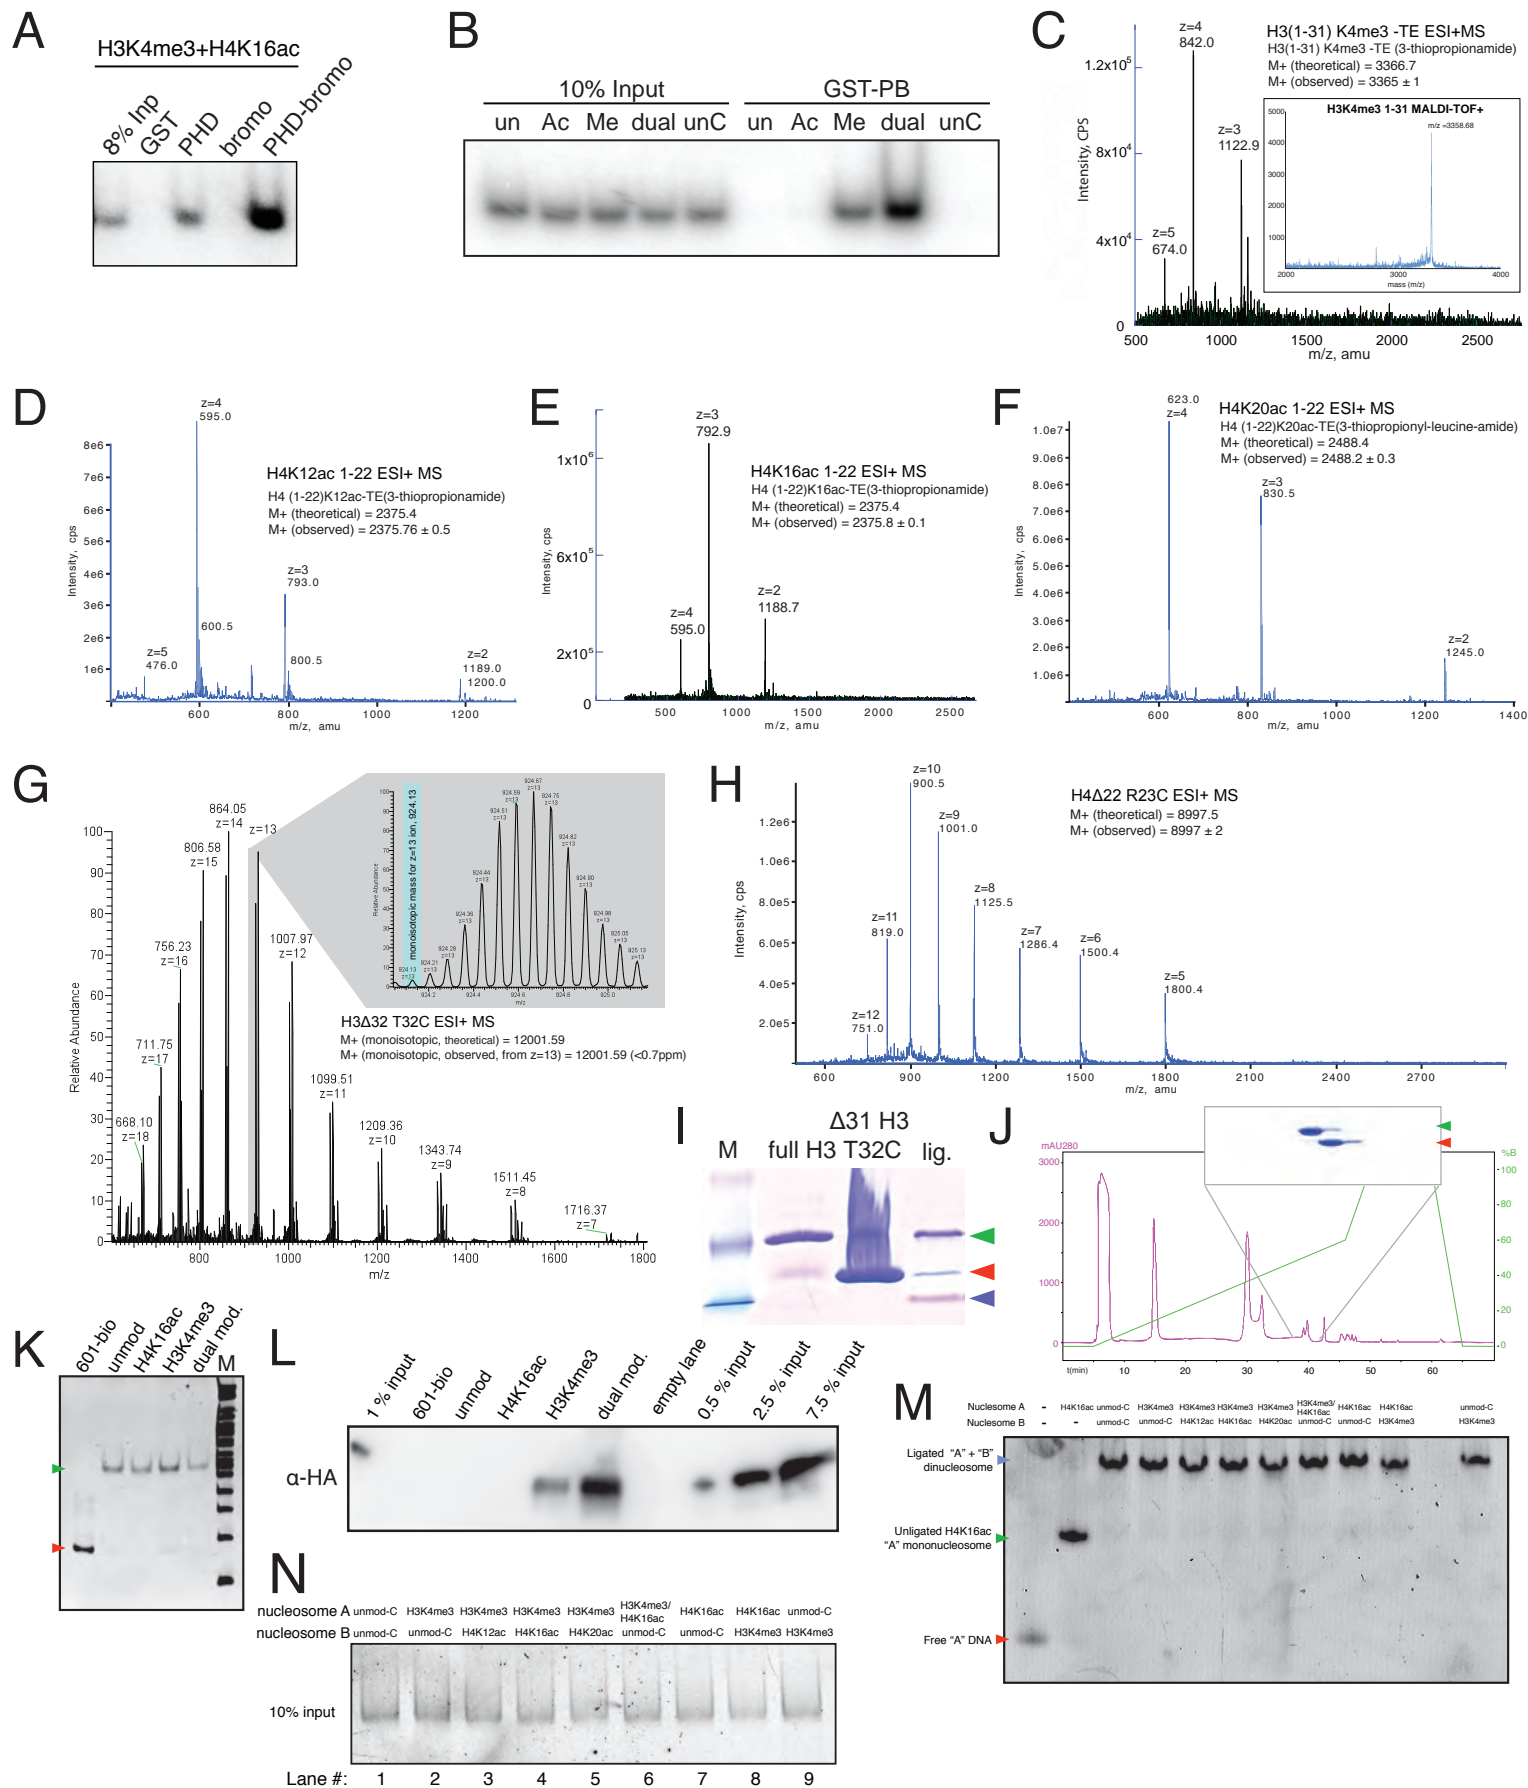

# Figure S4

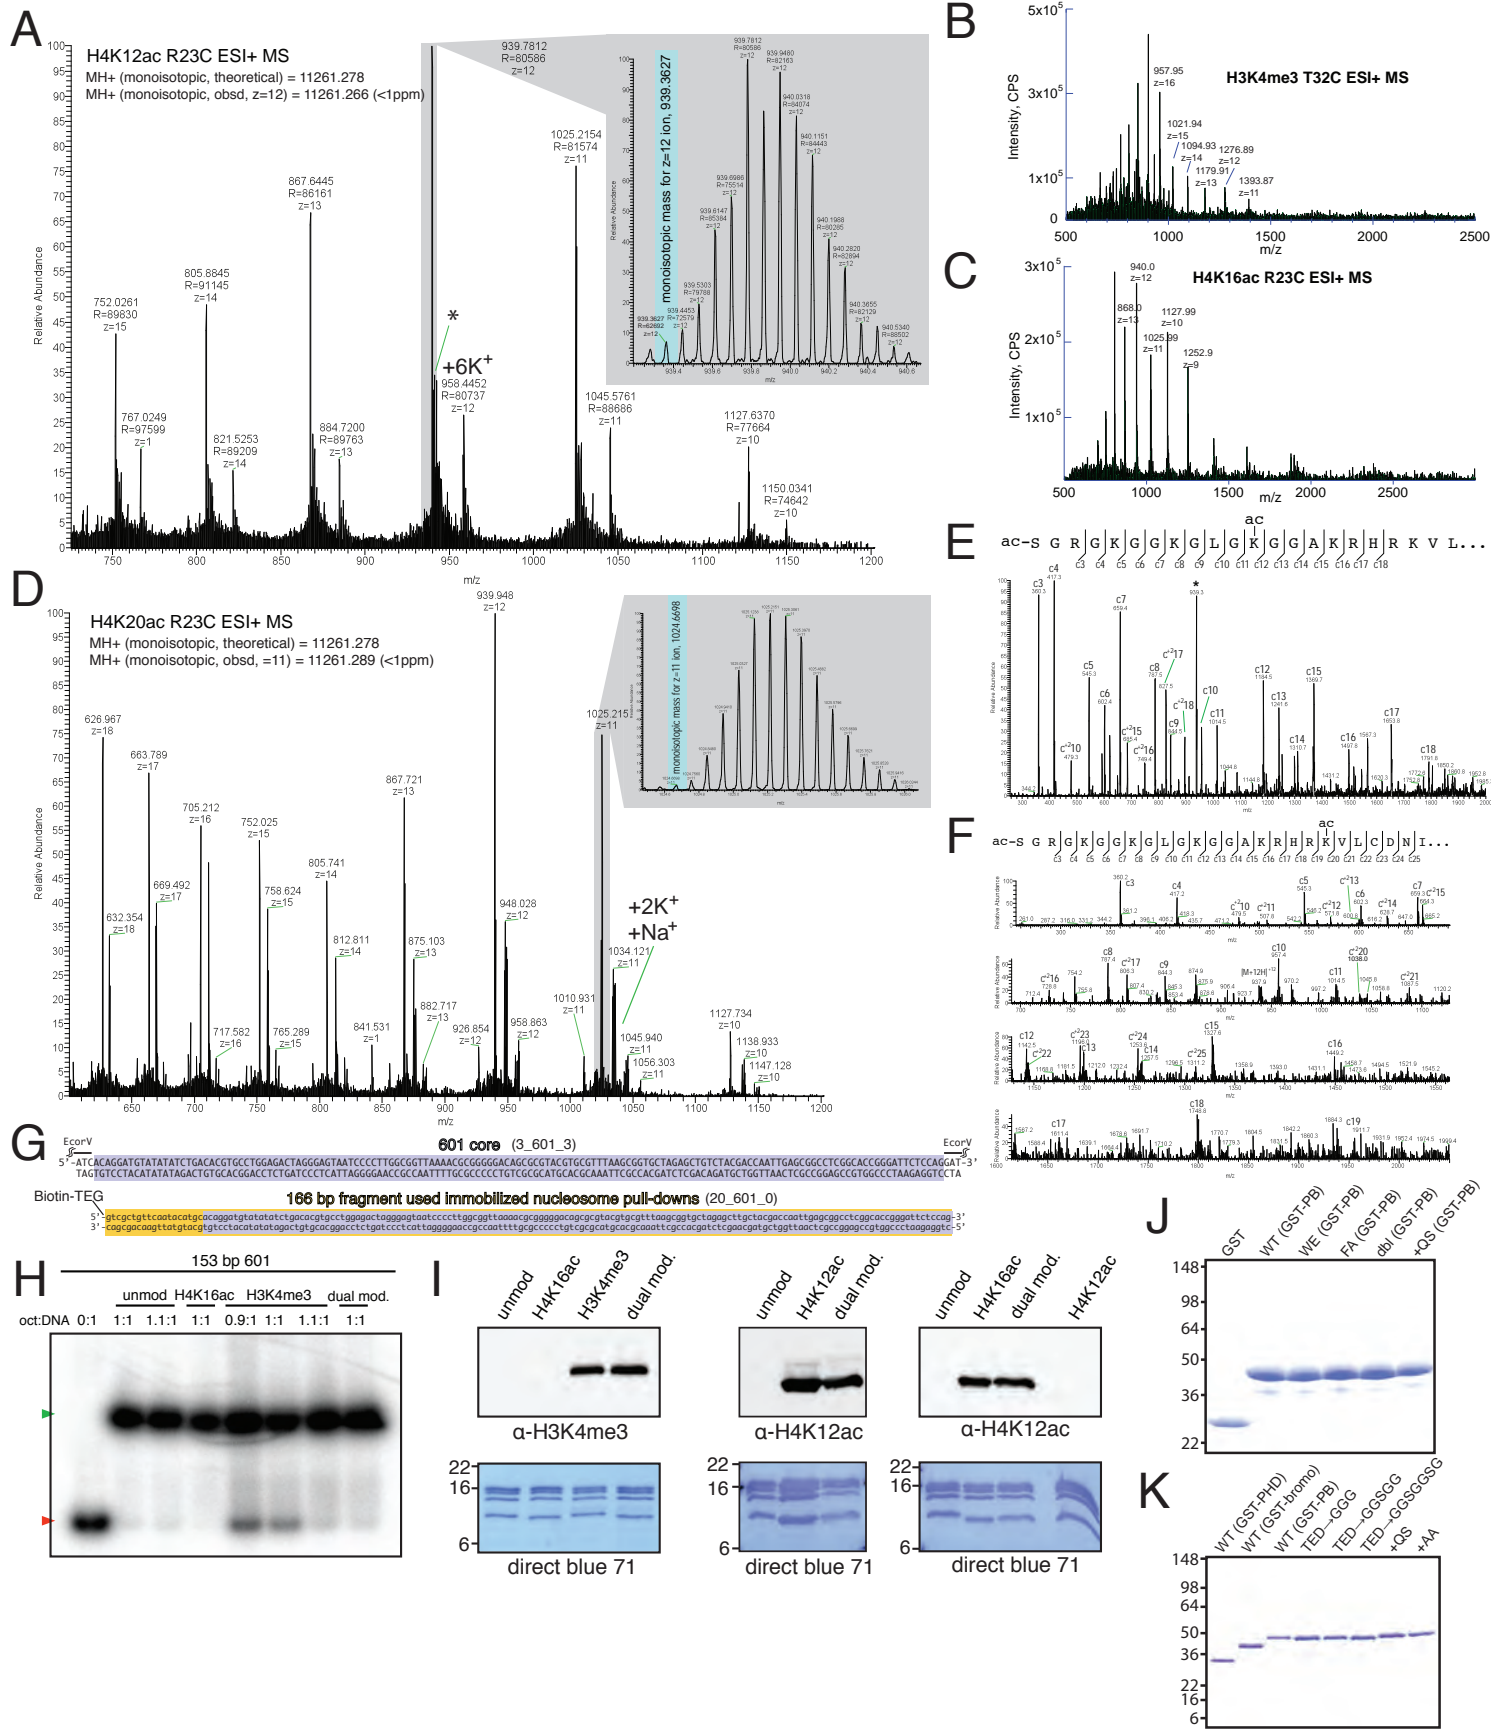

**Figure S5**

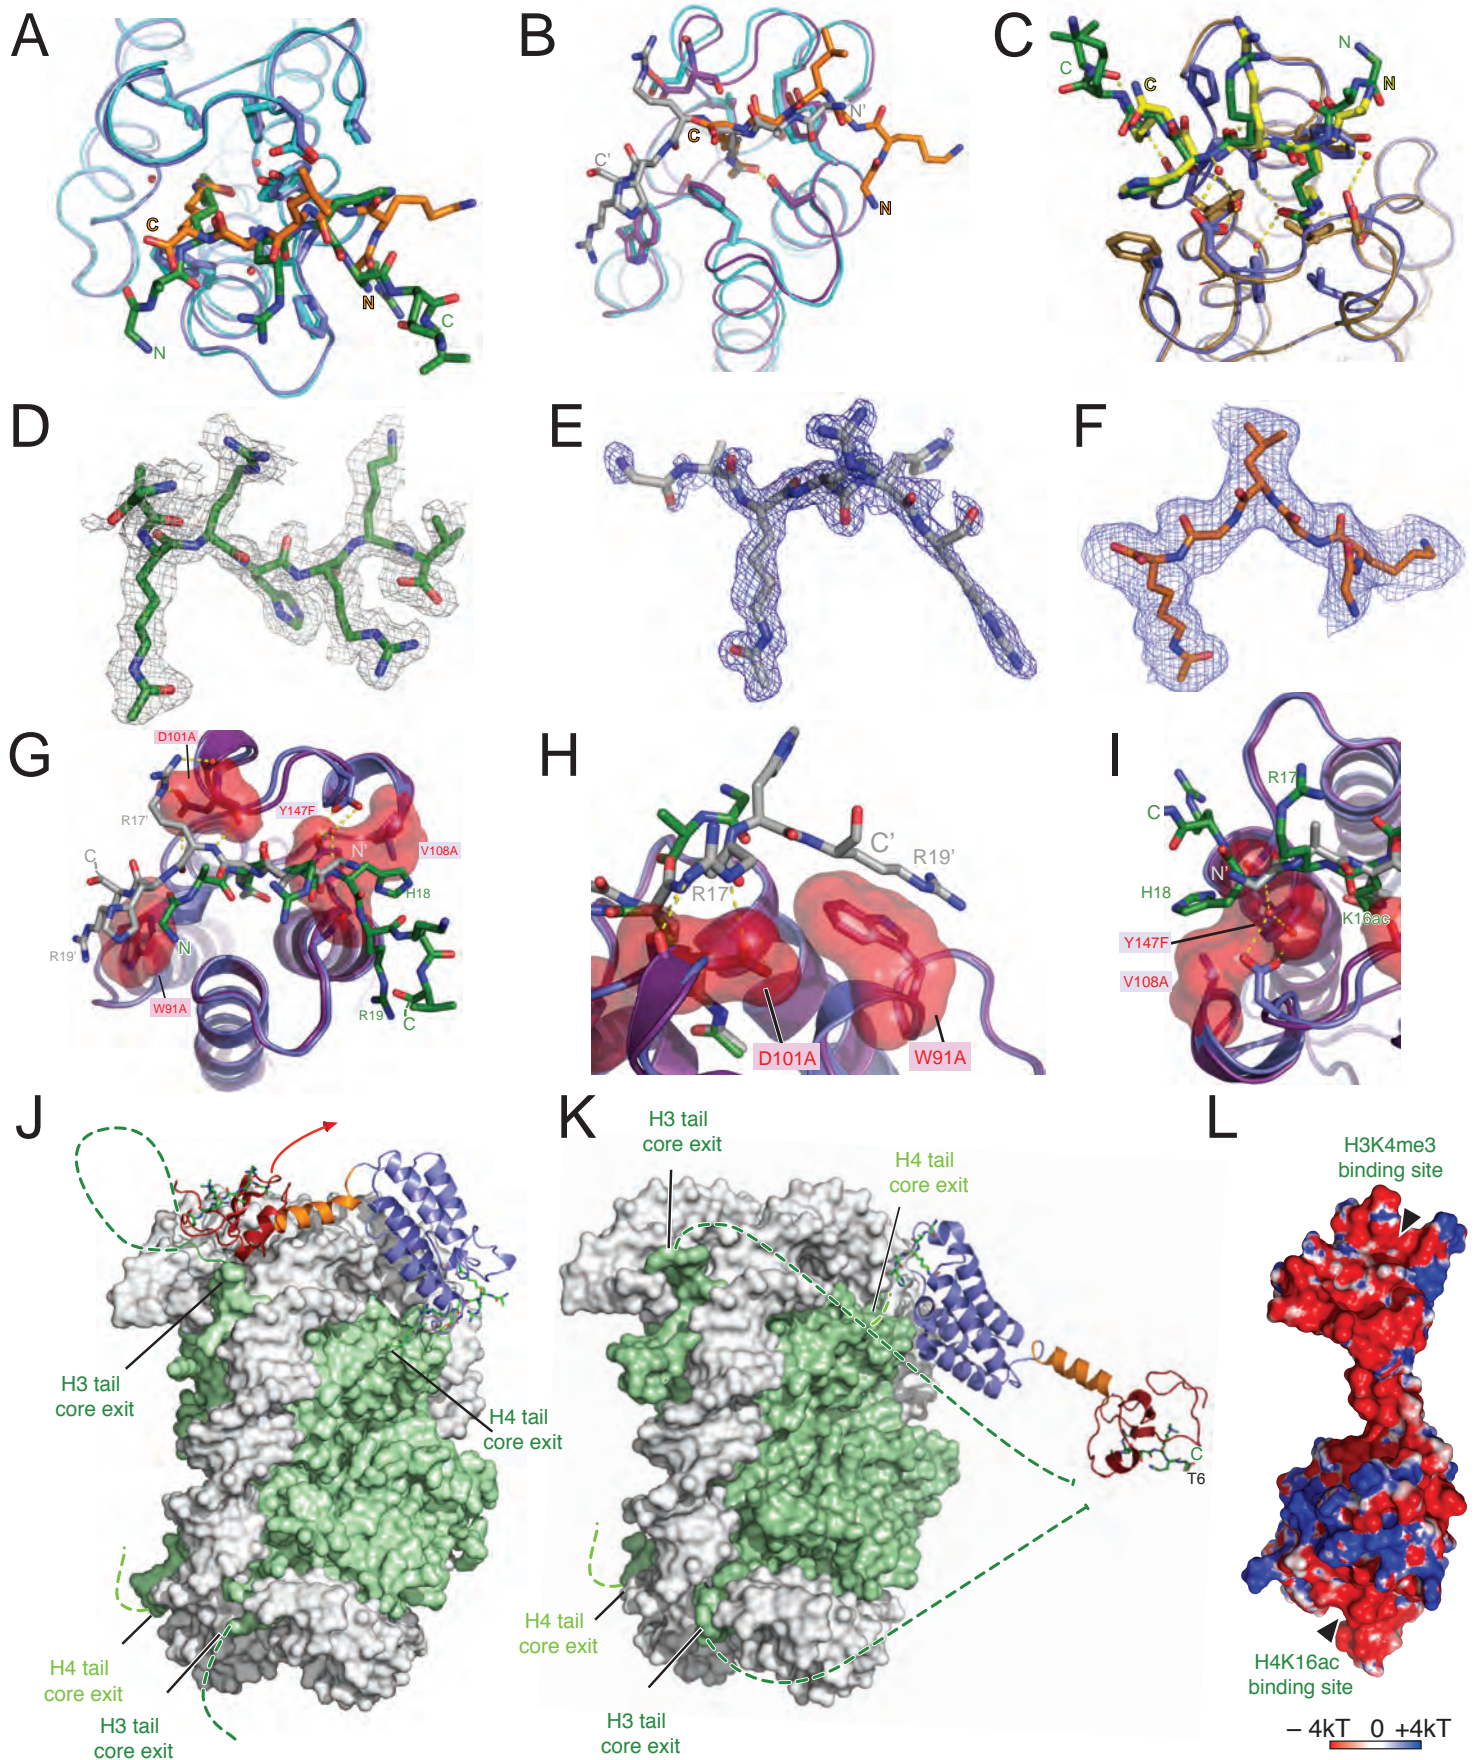

# Figure S6

**A**

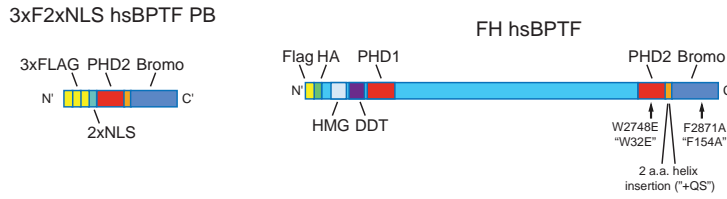

**B**

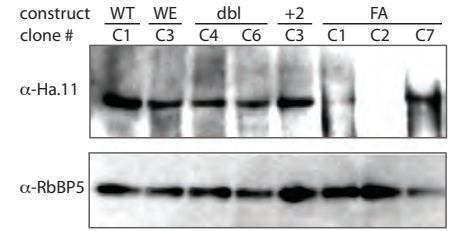

**C**

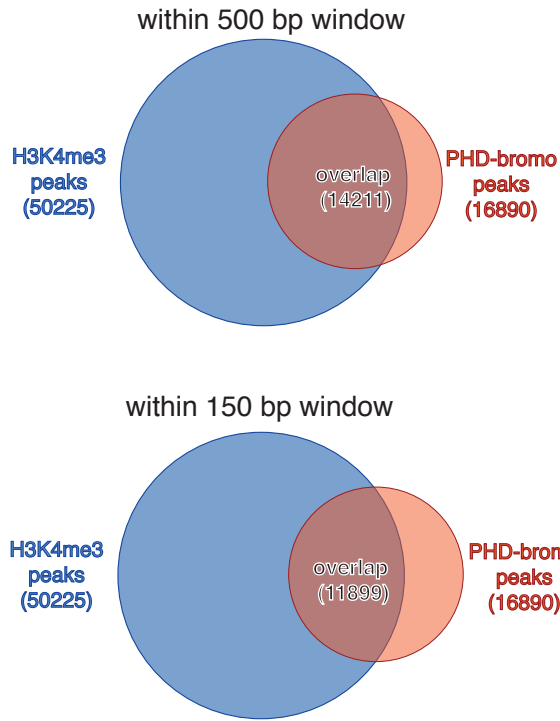

**D**

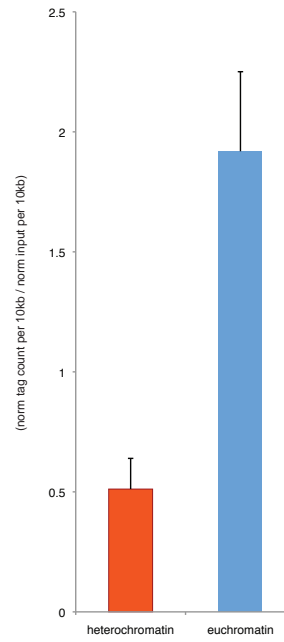

**E**

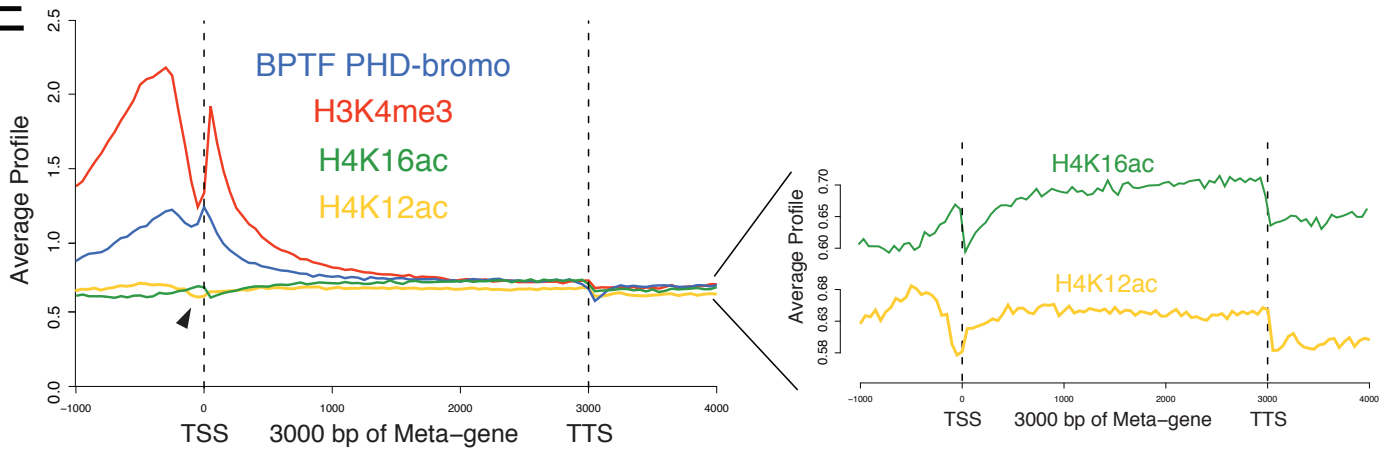

**Figure S7**

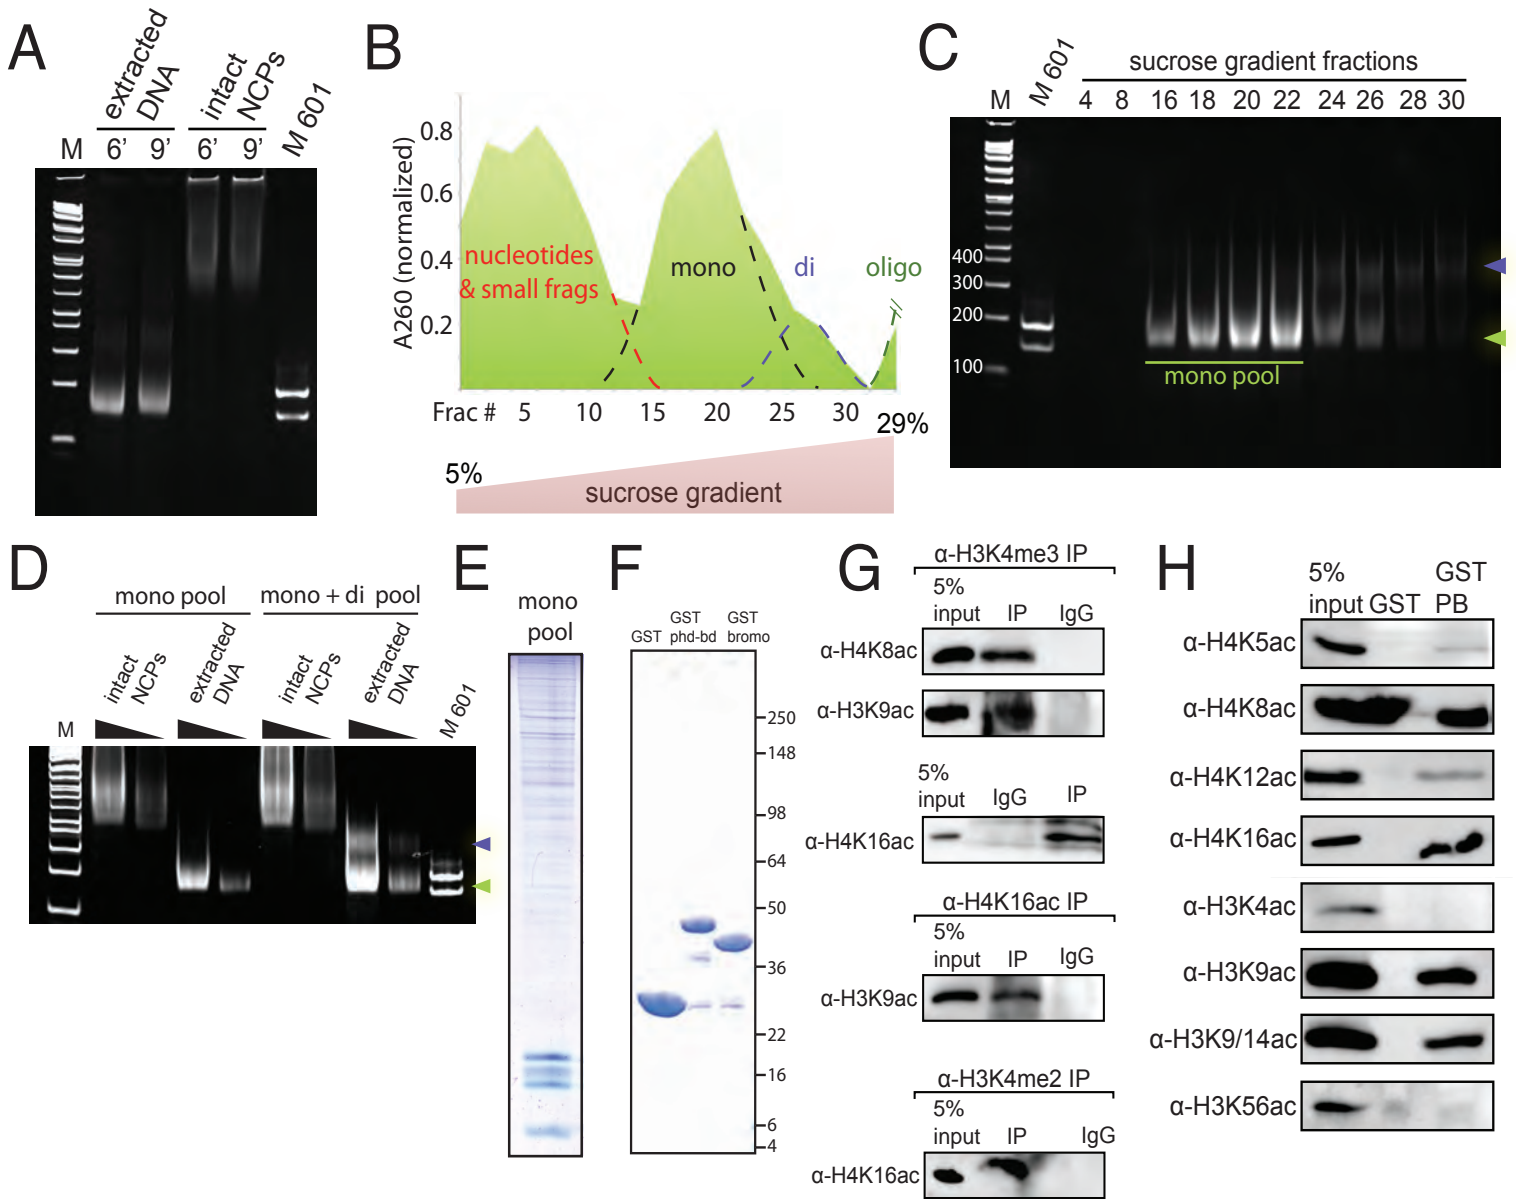

Supplement: NIHMS292220-supplement-02.pdf [file NIHMS292220-supplement-02.pdf]
